# Supplementary material
Source: PubMed Central journal article supplement (PMC5026126)

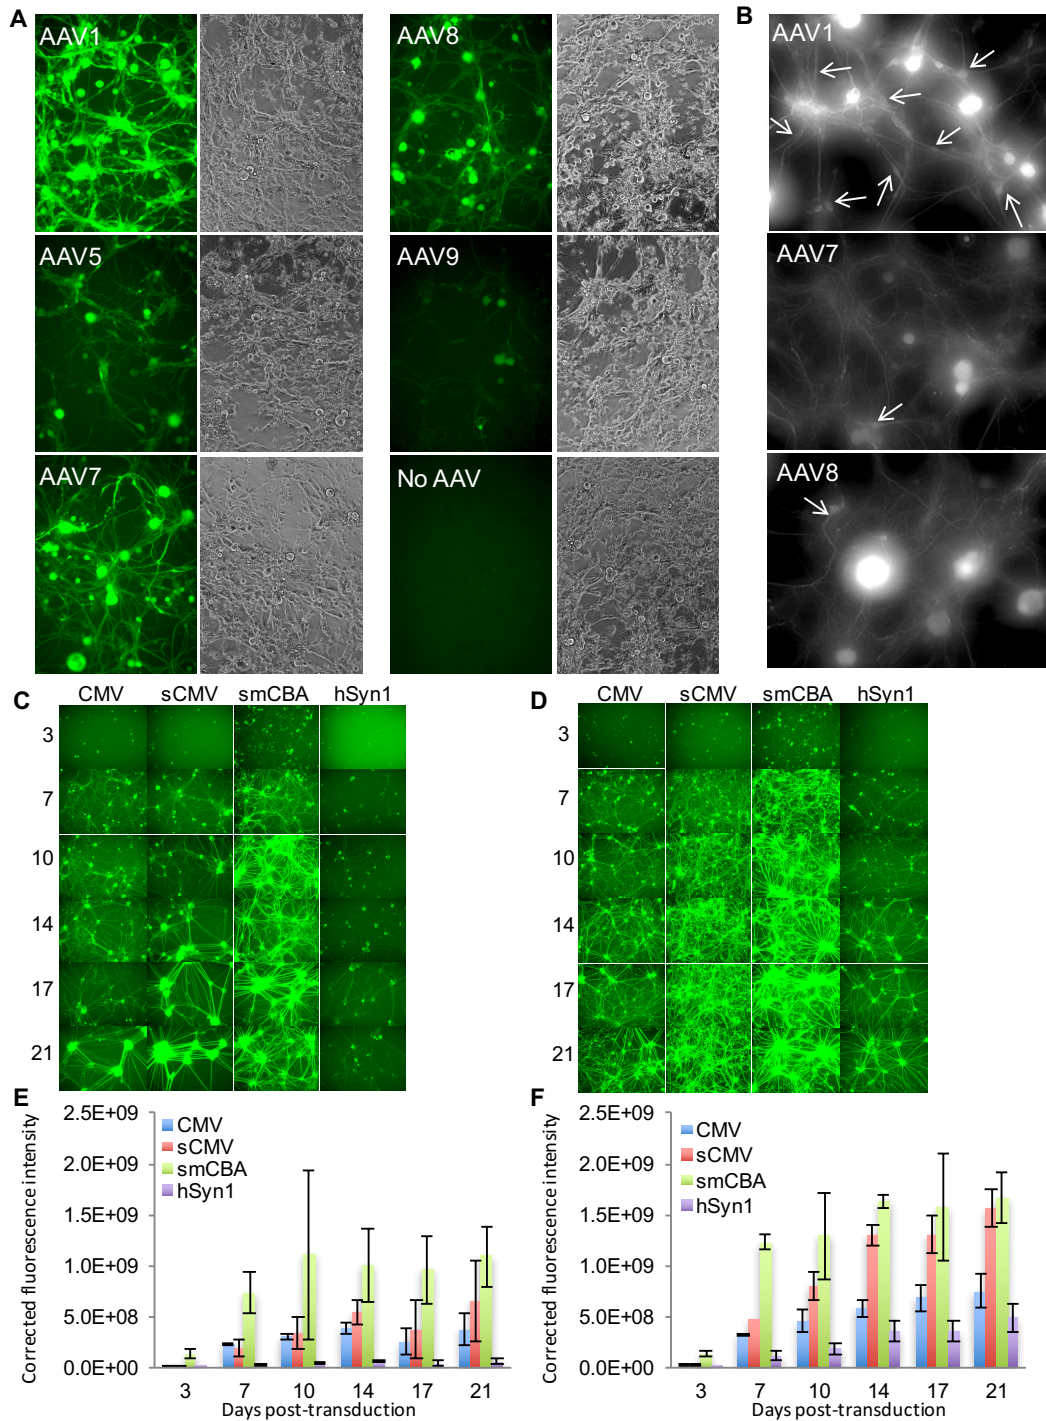

**Supplemental Figure 1. AAV capsid serotype and promoter screening for optimal transduction of primary TG neurons.** (A) Representative GFP fluorescence (left panels) and phase (right panels) images of neuronal cultures transduced with scAAV-smCBA-GFP vectors with the indicated capsid serotypes at a multiplicity of infection (MOI) of  $10^6$  vgs/neuron. Uninfected control cultures with no AAV are shown (No AAV). Magnification x100. (B) Representative GFP fluorescence images of neuronal

cultures transduced with scAAV-smCBA-GFP vectors with the indicated capsid serotypes at an MOI of  $10^6$  vgs/neuron. Arrows indicate GFP-positive non-neuronal cells identified based on cell morphology. Magnification x200.

**(C-D)** Representative GFP fluorescence images at 7, 10, 14, 17 and 21 days post transduction of neuronal cultures with scAAV-GFP vectors. AAV8 **(C)** and AAV1 **(D)** reporter vectors were used at a MOI of  $10^6$  vg/neuron. Magnification 100x. GFP was expressed from the human cytomegalovirus immediate-early (CMV), short CMV (sCMV), small hybrid CMV/chicken beta actin (smCBA) or human synapsin (hSyn) promoters. Quantification of GFP fluorescence in AAV8 **(e)** and AAV1 **(f)** vector transduced neuronal cultures at 7, 10, 14, 17 and 21 days post transduction.

### A. Experimental timeline

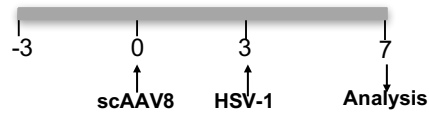

### B. Virus production in treated cells

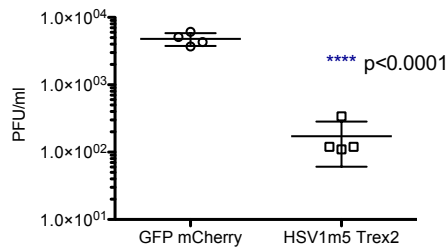

### C. Detection of mutation by Surveyor assay

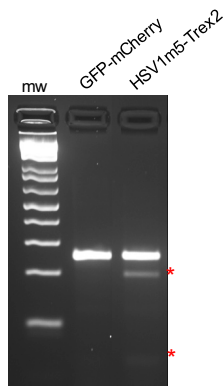

**Supplemental Figure 2. Impact of HSV1m5/Trex2 exposure on HSV replication in neuronal cultures.** (A) Schematic of the experimental timeline. Neuronal cultures were established in quadruplicate from dissociated murine TGs, and then co-transduced with scAAV8-sCMV-HSV1m5 + scAAV8-sCMV-Trex2, or scAAV8-sCMV-GFP + scAAV8-sCMV-mCherry at a MOI of  $10^6$  vg/AAV/neuron for 3 days prior to being infected with HSV-1 F $\Delta Us5$  at a MOI of 1 PFU/neuron for 4 further days. (B) Virion release in culture media was quantified by plaque assay. The mean +SD of four wells is indicated. The “p” value was calculated using a one-sided *t-test*. (C) Mutagenic event detection by T7E1 assay. The HSV regions containing the target site were PCR amplified from total genomic DNA obtained from four pooled wells, subjected to T7E1 digestion, and separated on a 3% agarose gel. mw: molecular weight size ladder, red asterisks indicate cleavage products.

**Supplemental Table 1. NGS analysis for experiment 1 (Figure 3)**

| Mouse | Treatment    | Total mutations | Total in target mutations |           |
|-------|--------------|-----------------|---------------------------|-----------|
|       |              |                 | Insertions                | Deletions |
| 1     | PBS          | 0.05%           | 0.01%                     | 0.04%     |
| 6     | NV1/Trex2    | 0.03%           | 0.01%                     | 0.02%     |
| 8     | HSV1m5/Trex2 | 2.05%           | 0.01%                     | 2.05%     |
| 9     | HSV1m5/Trex2 | 0.08%           | 0.01%                     | 0.07%     |
| 10    | HSV1m5/Trex2 | 3.92%           | 0.00%                     | 3.92%     |
| 11    | HSV1m5/Trex2 | 2.03%           | 0.00%                     | 2.03%     |



**Supplemental Table 2.** Sequence of the target site (ON) and off-target sites (OT) for HSV1m5, HSV1m8 and NV1.

| Enzyme | site  | Sequence                 |
|--------|-------|--------------------------|
| HSV1m5 | ON    | ATAAACTCACACACGGCGTCCTGG |
| HSV1m5 | OT-1  | ATAgACTCACACAtGcCGTCCTGt |
| HSV1m5 | OT-2  | ATAAACaCACACAaGcaGTCCTGG |
| HSV1m5 | OT-3  | ATcAACTCACACcCGtCcTCCTGG |
| HSV1m5 | OT-4  | AaAAACTCAaACAtGGCGTCCaGt |
| HSV1m5 | OT-5  | ATgcACTCAaACActGtGTCCTGG |
| HSV1m5 | OT-6  | tTAAAtTCAaActCGGCGTctTGG |
| HSV1m5 | OT-7  | cccAACTCACACActGctTCCTGG |
| HSv1m8 | ON    | CCGCTCTGTTTTACCGGTCTACG  |
| HSV1m8 | OT-1  | CCcCTCTGTTTTtCtGgGTCTACG |
| HSV1m8 | OT-2  | CgGCTtTGTTTTAtCGCaTCTtCG |
| HSV1m8 | OT-3  | CCGCaCTGTTTgACCGCcTCcAct |
| HSV1m8 | OT-4  | CCaCTCTGTaTTACCaTGTCTAct |
| HSV1m8 | OT-5  | tCGCTCTGTcTTgCtGCcTCTACG |
| HSV1m8 | OT-6  | CaGCTCTtTTTTcCcttGTCTACG |
| HSV1m8 | OT-7  | CtGCTCTGTTTcACctgGTCTAct |
| HSV1m8 | OT-18 | CCGgTtTGTTTTgCCaCGTCTAct |
| HSV1m8 | OT-10 | tCcCTCTcTTTTACaGaatCTACG |
| HSV1m8 | OT-11 | tCcCTCTGTTTgtCCtCGTgTACG |
| NV-1   | ON    | TTGTTCTCAGGTACCTCGGCCAA  |
| NV-1   | OT-1  | TTGTTCTCAGGTACCTcGaCAa   |
| NV-1   | OT-2  | CTGGCTGAGGTcCCTcAGAgCAA  |
| NV-1   | OT-3  | CgGGCTcAGGcACCTGAGAACAA  |
| NV-1   | OT-4  | CaGGCTGgGGTACCTGAGAACAt  |
| NV-1   | OT-5  | tTGGCTaAGcTACCTGgGAACAA  |

**Supplemental Table 3.** Primers used for PCR amplification of the regions containing the off-target (OT) sites in the mouse genome.

| Enzyme | OT site | Forward primer            | Reverse primer            |
|--------|---------|---------------------------|---------------------------|
| HSV1m5 | OT-1    | CTGTGTGTAGAAGACTCTAGAGGG  | CTGTGTGTAGAAGACTCTAGAGGG  |
| HSV1m5 | OT-2    | AAAGGGCAAGCCTGCCTTCC      | CTCACTCTACCCTTAGACCCC     |
| HSV1m5 | OT-3    | GCCAGAAGTTCCAGCTCAATGTC   | AGGGACTTGTCAACATGAGCGG    |
| HSV1m5 | OT-4    | CCAAGACAGAAGCTCCTTACGTCA  | CATTGACCTGAACCTGGGTCC     |
| HSV1m5 | OT-5    | CAGGTTTGCTCCTGTGATTGGTG   | TGTGTCCACAACAGACCCGAG     |
| HSV1m5 | OT-6    | TGTGGTGTGGTGTGGTGCCT      | GGGGCAAATTCTGCACCTCTTGT   |
| HSV1m5 | OT-7    | CCACAAAACCTGTGTCTCTAGCTGC | CCACAAAACCTGTGTCTCTAGCTGC |
| HSV1m8 | OT-1    | CAGGTAAGAGCCAGAACAATGGTC  | CATTGTCCACTTGAAGTGTGGCAG  |
| HSV1m8 | OT-2    | GAAAGCAAGCTTCCCTCCCTCG    | GGTGGGAGATTCCACCTTCTTTG   |
| HSV1m8 | OT-3    | CAGGACCTCTGGATCACTTGATTC  | CTCTCAAAGCTGTGCAGGACTAAC  |
| HSV1m8 | OT-4    | GGTTGAGAGGGTGGTTGGAAAAAG  | CAGAGGGGGTAGGTGAAAGATTG   |
| HSV1m8 | OT-5    | GGGTAGATGGCTGAGAAGGAAC    | GACTCAGGTCTTGAGTGTGAAGTG  |
| HSV1m8 | OT-6    | CTCCAGCCAACATGTGGAGAAG    | ACTGTCTGGGAACGGGGCAA      |
| HSV1m8 | OT-7    | GGCCTTAAGGCTTGATAGACAACC  | CCTTGTCTGTCACCACTCTCTC    |
| HSV1m8 | OT-8    | GATCAAACACCCTAGCCAAGGCA   | CCAAACAGGAAAACCTGAGATGGC  |
| HSV1m8 | OT-9    | GATGCATTTGCACAGAGGGTCC    | GAGAATAGTTTAGATGGGAGGGGG  |
| HSV1m8 | OT-10   | GCTCACCTGCATATGCGTATGCT   | CTTTCCAGCTGATTCAGAAGCCC   |
| NV-1   | OT-1    | AAGCTGCCTCACCGGTCTCA      | GCAGAAGACAGTGGTATTGAGGAG  |
| NV-1   | OT-2    | GGAGTAGGGATCTGAGACTTCG    | GAATCCAAACCCATTGCTCGCC    |
| NV-1   | OT-3    | GCCTCCAACAAGACCTGGAAC     | CACCAAGCACAGGTTAGACAGTAC  |
| NV-1   | OT-4    | GGTTGGATCCTCTGGGCTTG      | GTGGCATTAGGAAGTGACATTCGC  |
| NV-1   | OT-5    | GTGCCTTTTCAAAGGATCTCACCC  | GGAAAGGATTGGCCATTTTGGCTG  |

Full unedited gels for Figure 1

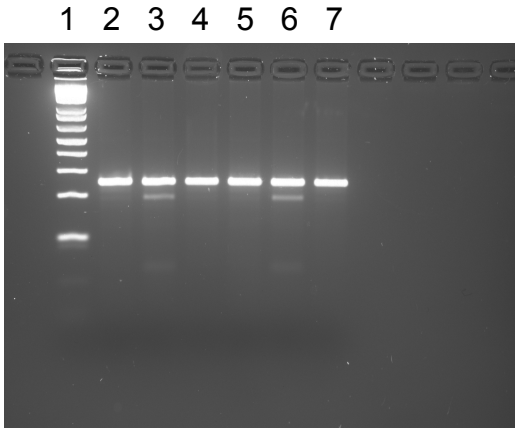

Full unedited gel for Figure 1, left panel. Lanes 1-4 correspond to the lanes shown in the manuscript cropped figure.

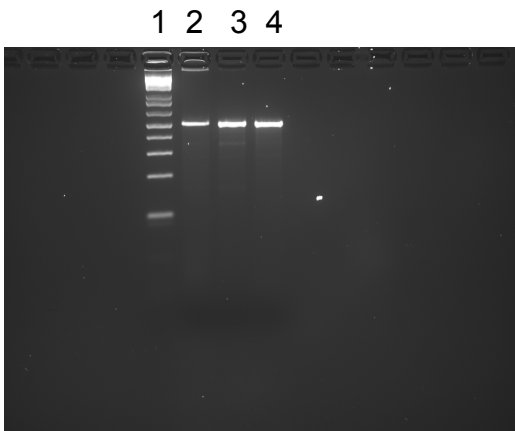

Full unedited gels for Figure 1, right panel. Lanes 1-4 correspond to the lanes shown in the manuscript cropped figure.

Full unedited gels for Figure 2

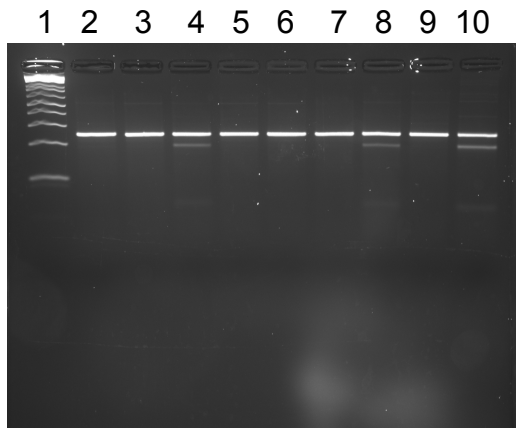

Full unedited gel for Figure 2, top panel.  
Lanes 1-10 correspond to the lanes shown in  
the manuscript cropped figure.

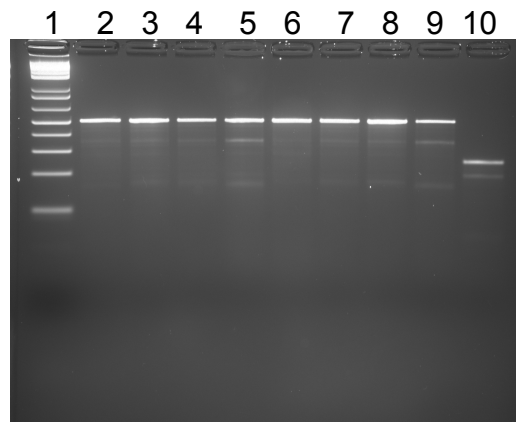

Full unedited gels for Figure 2, bottom panel.  
Lanes 1-10 correspond to the lanes shown in  
the manuscript cropped figure.

Full unedited gels for Figure 3

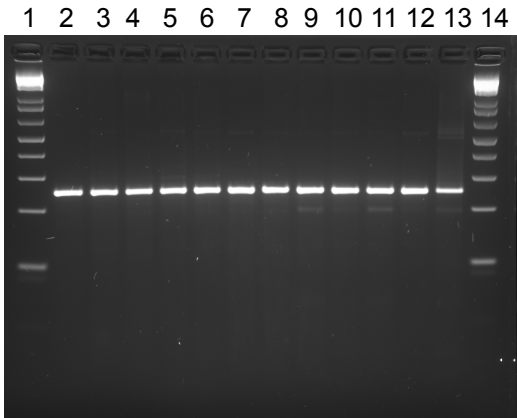

Full unedited gel for Figure 3, top panel.  
Lanes 1-13 correspond to the lanes shown in  
the manuscript cropped figure.

Full unedited gels for Figure 5

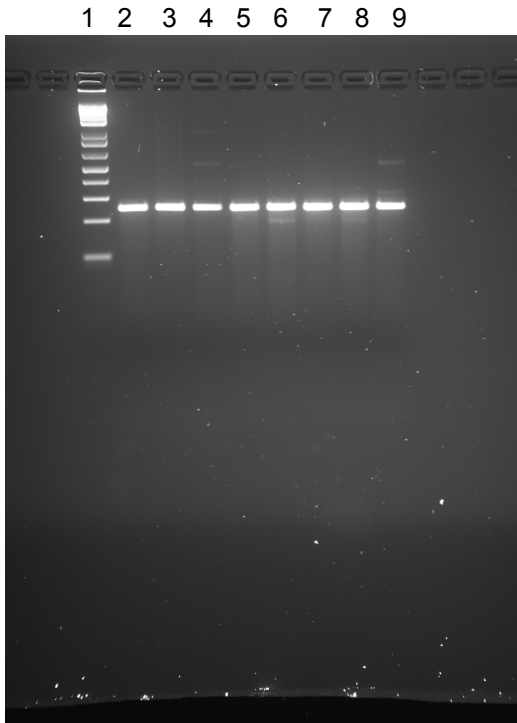

Full unedited gel for Figure 5, top panel.  
Lanes 1-8 correspond to the lanes shown in  
the manuscript cropped figure.

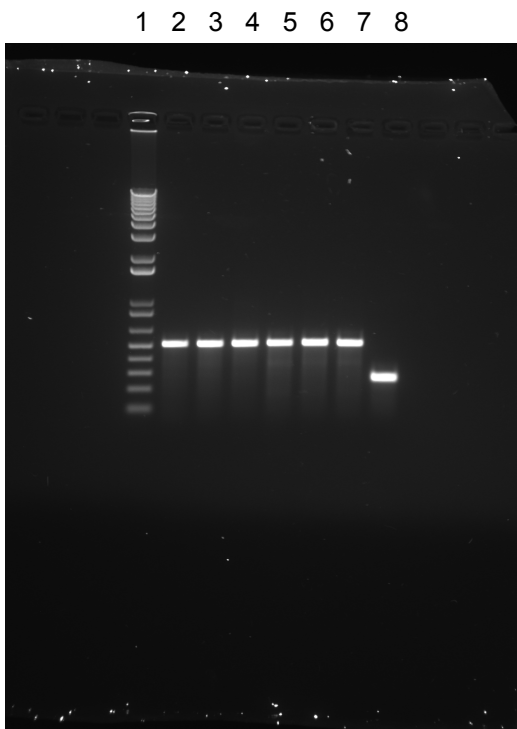

Full unedited gels for Figure 5, bottom panel.  
Lanes 1-7 correspond to the lanes shown in  
the manuscript cropped figure.

Full unedited gels for Supplemental Figure 2

Full unedited gel for Figure 2c, .  
Lanes 1, 2, and 4 correspond to the lanes  
shown in the supplemental figure 2.

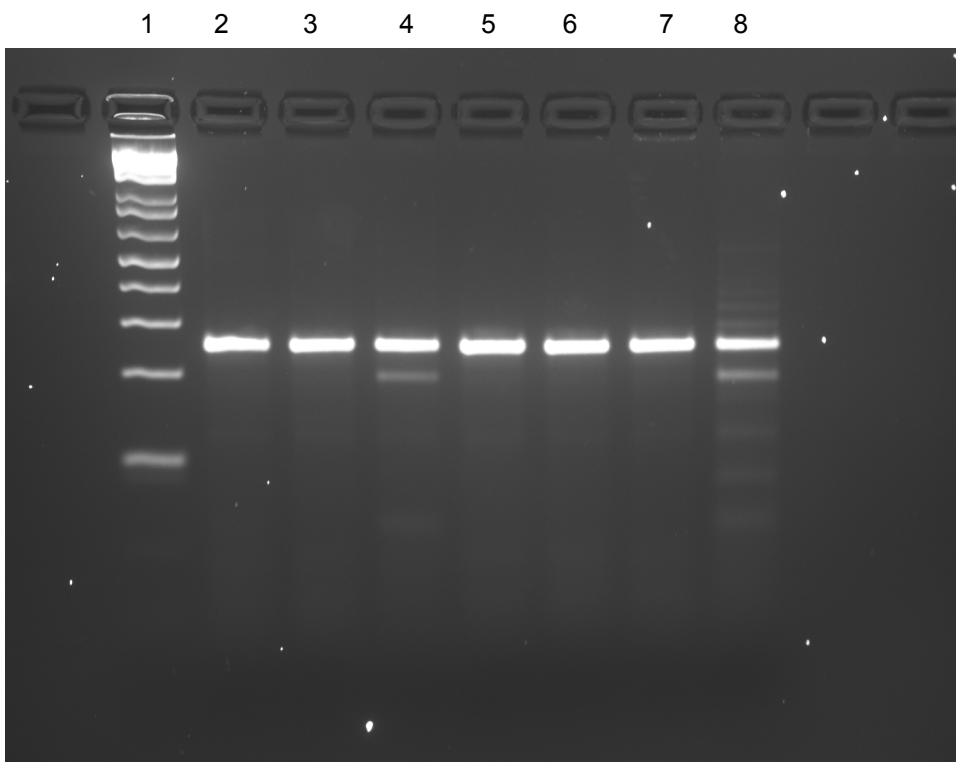

Supplement: NIHMS815893-supplement-Supplemental_data.pdf [file NIHMS815893-supplement-Supplemental_data.pdf]
